# Supplementary material
Source: PubMed Central journal article supplement (PMC3422448)
Supplement: NIHMS395270-supplement-02.pdf [file NIHMS395270-supplement-02.pdf]

**Supplement Table 1: RT-PCR Profiler Micro Array**

**Apoptosis Array**

| Gene    | AVG ΔCt |         | 2 <sup>-ΔCt</sup> |          | Fold change<br>siRNA/Control |
|---------|---------|---------|-------------------|----------|------------------------------|
|         | siRNA   | Control | siRNA             | Control  |                              |
| ABL1    | 18.1    | 17.84   | 0.000004          | 0.000004 | -1.2                         |
| AKT1    | 18.1    | 17.47   | 0.000004          | 0.000006 | -1.55                        |
| APAF1   | 18.1    | 18.08   | 0.000004          | 0.000004 | -1.01                        |
| BAD     | 18.1    | 9.37    | 0.000004          | 0.001511 | -424.61                      |
| BAG1    | 18.1    | 17.16   | 0.000004          | 0.000007 | -1.92                        |
| BAG3    | 18.1    | 4.48    | 0.000004          | 0.044811 | -12590.08                    |
| BAG4    | 18.1    | 18.08   | 0.000004          | 0.000004 | -1.01                        |
| BAK1    | 18.1    | 18.08   | 0.000004          | 0.000004 | -1.01                        |
| BAX     | 18.1    | 18.08   | 0.000004          | 0.000004 | -1.01                        |
| BCL10   | 18.1    | 9.22    | 0.000004          | 0.001677 | -471.14                      |
| BCL2    | 18.1    | 17.68   | 0.000004          | 0.000005 | -1.34                        |
| BCL2A1  | 18.1    | 18.08   | 0.000004          | 0.000004 | -1.01                        |
| BCL2L1  | 18.1    | 17.38   | 0.000004          | 0.000006 | -1.65                        |
| BCL2L10 | 18.1    | 18.08   | 0.000004          | 0.000004 | -1.01                        |
| BCL2L11 | 18.1    | 18.08   | 0.000004          | 0.000004 | -1.01                        |
| BCL2L2  | 18.1    | 11.58   | 0.000004          | 0.000327 | -91.77                       |
| BCLAF1  | 16.25   | 16.74   | 0.000013          | 0.000009 | 1.4                          |
| BFAR    | 18.1    | 18.08   | 0.000004          | 0.000004 | -1.01                        |
| BID     | 18.1    | 18.08   | 0.000004          | 0.000004 | -1.01                        |
| BIK     | 18.1    | 17.96   | 0.000004          | 0.000004 | -1.1                         |
| NAIP    | 18.1    | 18.08   | 0.000004          | 0.000004 | -1.01                        |
| BIRC2   | 18.1    | 14.89   | 0.000004          | 0.000033 | -9.25                        |
| BIRC3   | 18.1    | 18.08   | 0.000004          | 0.000004 | -1.01                        |
| XIAP    | 18.1    | 18.08   | 0.000004          | 0.000004 | -1.01                        |
| BIRC6   | 18.1    | 18.08   | 0.000004          | 0.000004 | -1.01                        |
| BIRC8   | 18.1    | 18.08   | 0.000004          | 0.000004 | -1.01                        |
| BNIP1   | 18.1    | 9.03    | 0.000004          | 0.001913 | -537.45                      |
| BNIP2   | 18.1    | 16.74   | 0.000004          | 0.000009 | -2.57                        |
| BNIP3   | 18.1    | 16.12   | 0.000004          | 0.000014 | -3.94                        |
| BNIP3L  | 18.1    | 13.4    | 0.000004          | 0.000093 | -25.99                       |
| BRAF    | 18.1    | 18.08   | 0.000004          | 0.000004 | -1.01                        |
| NOD1    | 15.59   | 18.08   | 0.000002          | 0.000004 | 5.62                         |
| CARD6   | 18.1    | 18.08   | 0.000004          | 0.000004 | -1.01                        |
| CARD8   | 18.1    | 18.08   | 0.000004          | 0.000004 | -1.01                        |
| CASP1   | 16.39   | 8.59    | 0.000012          | 0.002595 | -222.86                      |
| CASP10  | 18.1    | 14.44   | 0.000004          | 0.000045 | -12.64                       |
| CASP14  | 18.1    | 17.69   | 0.000004          | 0.000005 | -1.33                        |
| CASP2   | 18.1    | 18.08   | 0.000004          | 0.000004 | -1.01                        |
| CASP3   | 18.1    | 12.82   | 0.000004          | 0.000138 | -38.85                       |

**Inflammation Array**

| Gene   | AVG ΔCt |         | 2 <sup>-ΔCt</sup> |           | Fold change<br>siRNA/Control |
|--------|---------|---------|-------------------|-----------|------------------------------|
|        | siRNA   | Control | siRNA             | Control   |                              |
| ABCF1  | 20.03   | 19.09   | 0.000001          | 0.000002  | -1.92                        |
| BCL6   | 14.28   | 19.09   | 0.000005          | 0.000002  | 28.05                        |
| C3     | 20.03   | 19.09   | 0.000001          | 0.000002  | -1.92                        |
| C4A    | 20.03   | 19.09   | 0.000001          | 0.000002  | -1.92                        |
| C5     | 20.03   | 19.09   | 0.000001          | 0.000002  | -1.92                        |
| CCL1   | 20.03   | 19.09   | 0.000001          | 0.000002  | -1.92                        |
| CCL11  | 20.03   | 19.09   | 0.000001          | 0.000002  | -1.92                        |
| CCL13  | 20.03   | 19.09   | 0.000001          | 0.000002  | -1.92                        |
| CCL15  | 20.03   | 19.09   | 0.000001          | 0.000002  | -1.92                        |
| CCL16  | 20.03   | 19.09   | 0.000001          | 0.000002  | -1.92                        |
| CCL17  | 20.03   | 19.09   | 0.000001          | 0.000002  | -1.92                        |
| CCL18  | 20.03   | 14.11   | 0.000001          | 0.000057  | -60.55                       |
| CCL19  | 20.03   | 19.09   | 0.000001          | 0.000002  | -1.92                        |
| CCL2   | 7.63    | 6.27    | 0.005048          | 0.012958  | -2.57                        |
| CCL20  | 20.03   | 13.71   | 0.000001          | 0.000075  | -79.89                       |
| CCL21  | 20.03   | 19.09   | 0.000001          | 0.000002  | -1.92                        |
| CCL23  | 20.03   | 19.09   | 0.000001          | 0.000002  | -1.92                        |
| CCL24  | 12.86   | 12.73   | 0.000135          | 0.000147  | -1.09                        |
| CCL25  | 20.03   | 19.09   | 0.000001          | 0.000002  | -1.92                        |
| CCL26  | 9.79    | 8.75    | 0.00113           | 0.002323  | -2.06                        |
| CCL3   | 12.47   | 9.46    | 0.000176          | 0.00142   | -8.06                        |
| CCL4   | 11.16   | 9.71    | 0.000437          | 0.001194  | -2.73                        |
| CCL5   | 14.81   | 1.77    | 0.000035          | 0.293209  | -8422.31                     |
| CCL7   | 14.52   | 19.09   | 0.000043          | 0.000002  | 23.75                        |
| CCL8   | 20.03   | 19.09   | 0.000001          | 0.000002  | -1.92                        |
| CCR1   | 18.32   | 18.31   | 0.000003          | 0.000003  | -1.01                        |
| CCR2   | 20.03   | 19.09   | 0.000001          | 0.000002  | -1.92                        |
| CCR3   | 18.18   | 18.51   | 0.000003          | 0.000003  | 1.26                         |
| CCR4   | 20.03   | 19.09   | 0.000001          | 0.000002  | -1.92                        |
| CCR5   | 20.03   | 19.09   | 0.000001          | 0.000002  | -1.92                        |
| CCR6   | 20.03   | 19.09   | 0.000001          | 0.000002  | -1.92                        |
| CCR7   | 20.03   | 19.09   | 0.000001          | 0.000002  | -1.92                        |
| CCR8   | 20.03   | 19.09   | 0.000001          | 0.000002  | -1.92                        |
| CCR9   | 20.03   | 19.09   | 0.000001          | 0.000002  | -1.92                        |
| CEBPB  | 20.03   | 8.28    | 0.000001          | 0.003217  | -3444.31                     |
| CRP    | 20.03   | 19.09   | 0.000001          | 0.000002  | -1.92                        |
| CX3CR1 | 20.03   | 19.09   | 0.000001          | 0.000002  | -1.92                        |
| CXCL1  | 9.83    | -5.43   | 0.001099          | 43.111474 | -39238.98                    |
| CXCL10 | 8.05    | 4.89    | 0.003773          | 0.033726  | -8.94                        |

**Supplement Table 1 (continued): RT-PCR Profiler Micro Array****Apoptosis Array**

| Gene      | AVG ΔCt |         | 2 <sup>-ΔCt</sup> |          | Fold change<br>siRNA/Control |
|-----------|---------|---------|-------------------|----------|------------------------------|
|           | siRNA   | Control | siRNA             | Control  |                              |
| CASP5     | 18.1    | 18.08   | 0.000004          | 0.000004 | -1.01                        |
| CASP6     | 18.1    | 7.66    | 0.000004          | 0.004944 | -1389.16                     |
| CASP7     | 18.1    | 18.08   | 0.000004          | 0.000004 | -1.01                        |
| CASP8     | 18.1    | 18.08   | 0.000004          | 0.000004 | -1.01                        |
| CASP9     | 18.1    | 18.08   | 0.000004          | 0.000004 | -1.01                        |
| CD40      | 16.33   | 18.08   | 0.000012          | 0.000004 | 3.36                         |
| CD40LG    | 18.1    | 18.08   | 0.000004          | 0.000004 | -1.01                        |
| CFLAR     | 18.1    | 18.08   | 0.000004          | 0.000004 | -1.01                        |
| CIDEA     | 17.91   | 13.11   | 0.000004          | 0.000113 | -27.86                       |
| CIDEB     | 18.1    | 18.08   | 0.000004          | 0.000004 | -1.01                        |
| CRADD     | 18.1    | 18.08   | 0.000004          | 0.000004 | -1.01                        |
| DAPK1     | 18.1    | 18.08   | 0.000004          | 0.000004 | -1.01                        |
| DFFA      | 18.1    | 6.82    | 0.000004          | 0.008851 | -2486.67                     |
| FADD      | 18.1    | 18.08   | 0.000004          | 0.000004 | -1.01                        |
| FAS       | 18.1    | 3       | 0.000004          | 0.125    | -35119.87                    |
| FASLG     | 18.1    | 18.08   | 0.000004          | 0.000004 | -1.01                        |
| GADD45A   | 7.92    | 5.71    | 0.004129          | 0.019104 | -4.63                        |
| HRK       | 18.1    | 18.08   | 0.000004          | 0.000004 | -1.01                        |
| IGF1R     | 18.1    | 18.08   | 0.000004          | 0.000004 | -1.01                        |
| LTA       | 18.1    | 17.8    | 0.000004          | 0.000004 | -1.23                        |
| LTBR      | 10.01   | 14.68   | 0.00097           | 0.000038 | 25.46                        |
| MCL1      | 7.69    | 9.72    | 0.004843          | 0.001186 | 4.08                         |
| NOL3      | 18.1    | 18.08   | 0.000004          | 0.000004 | -1.01                        |
| PYCARD    | 18.1    | 7.5     | 0.000004          | 0.005524 | -1552.09                     |
| RIPK2     | 18.1    | 5.47    | 0.000004          | 0.022561 | -6338.83                     |
| TNF       | 18.1    | 18.08   | 0.000004          | 0.000004 | -1.01                        |
| TNFRSF10A | 18.1    | 18.08   | 0.000004          | 0.000004 | -1.01                        |
| TNFRSF10B | 12.71   | 12.65   | 0.000149          | 0.000156 | -1.04                        |
| TNFRSF11B | 18.1    | 18.08   | 0.000004          | 0.000004 | -1.01                        |
| TNFRSF1A  | 18.1    | 18.08   | 0.000004          | 0.000004 | -1.01                        |
| TNFRSF21  | 18.1    | 18.08   | 0.000004          | 0.000004 | -1.01                        |
| TNFRSF25  | 18.1    | 18.08   | 0.000004          | 0.000004 | -1.01                        |
| CD27      | 18.1    | 18.08   | 0.000004          | 0.000004 | -1.01                        |
| TNFRSF9   | 18.1    | 18.08   | 0.000004          | 0.000004 | -1.01                        |
| TNFSF10   | 14.26   | 6.58    | 0.000051          | 0.010453 | -205.07                      |
| CD70      | 18.1    | 9.76    | 0.000004          | 0.001153 | -324.03                      |
| TNFSF8    | 18.1    | 18.08   | 0.000004          | 0.000004 | -1.01                        |
| TP53      | 18.1    | 18.08   | 0.000004          | 0.000004 | -1.01                        |
| TP53BP2   | 11.15   | 18.07   | 0.00044           | 0.000004 | 121.1                        |

**Inflammation Array**

| Gene    | AVG ΔCt |         | 2 <sup>-ΔCt</sup> |          | Fold change<br>siRNA/Control |
|---------|---------|---------|-------------------|----------|------------------------------|
|         | siRNA   | Control | siRNA             | Control  |                              |
| CXCL12  | 18.53   | 18.35   | 0.000003          | 0.000003 | -1.13                        |
| CXCL13  | 20.03   | 19.09   | 0.000001          | 0.000002 | -1.92                        |
| CXCL14  | 20.03   | 19.09   | 0.000001          | 0.000002 | -1.92                        |
| CXCL2   | 14.76   | 5.81    | 0.000036          | 0.017824 | -494.56                      |
| CXCL3   | 6.98    | 10.93   | 0.007922          | 0.000513 | 15.45                        |
| CXCL5   | 18.42   | 7.58    | 0.000003          | 0.005226 | -1833.01                     |
| CXCL6   | 17      | 19.09   | 0.000008          | 0.000002 | 4.26                         |
| CXCL9   | 20.03   | 19.09   | 0.000001          | 0.000002 | -1.92                        |
| ICEBERG | 20.03   | 19.09   | 0.000001          | 0.000002 | -1.92                        |
| IFNA2   | 20.03   | 19.09   | 0.000001          | 0.000002 | -1.92                        |
| IL10    | 20.03   | 5.64    | 0.000001          | 0.020054 | -21469.49                    |
| IL10RA  | 20.03   | 19.09   | 0.000001          | 0.000002 | -1.92                        |
| IL10RB  | 20.03   | 12.61   | 0.000001          | 0.00016  | -171.25                      |
| IL13    | 20.03   | 19.09   | 0.000001          | 0.000002 | -1.92                        |
| IL13RA1 | 15.72   | 19.09   | 0.000019          | 0.000002 | 10.34                        |
| IL17C   | 20.03   | 19.09   | 0.000001          | 0.000002 | -1.92                        |
| IL1A    | 20.03   | 19.09   | 0.000001          | 0.000002 | -1.92                        |
| IL1B    | 20.03   | 19.09   | 0.000001          | 0.000002 | -1.92                        |
| IL1F10  | 20.03   | 19.09   | 0.000001          | 0.000002 | -1.92                        |
| IL1F5   | 20.03   | 12.96   | 0.000001          | 0.000126 | -134.36                      |
| IL1F6   | 20.03   | 19.09   | 0.000001          | 0.000002 | -1.92                        |
| IL1F7   | 20.03   | 19.09   | 0.000001          | 0.000002 | -1.92                        |
| IL1F8   | 20.03   | 11.63   | 0.000001          | 0.000316 | -337.79                      |
| IL1F9   | 20.03   | 19.09   | 0.000001          | 0.000002 | -1.92                        |
| IL1R1   | 17.8    | 14.03   | 0.000004          | 0.00006  | -13.64                       |
| IL1RN   | 6.04    | 5.6     | 0.015198          | 0.020617 | -1.36                        |
| IL22    | 20.03   | 19.09   | 0.000001          | 0.000002 | -1.92                        |
| IL5     | 20.03   | 19.09   | 0.000001          | 0.000002 | -1.92                        |
| IL5RA   | 20.03   | 19.09   | 0.000001          | 0.000002 | -1.92                        |
| IL8     | 5.93    | 1.18    | 0.016402          | 0.441351 | -26.91                       |
| IL8RA   | 20.03   | 19.09   | 0.000001          | 0.000002 | -1.92                        |
| IL8RB   | 20.03   | 19.09   | 0.000001          | 0.000002 | -1.92                        |
| IL9     | 20.03   | 19.09   | 0.000001          | 0.000002 | -1.92                        |
| IL9R    | 20.03   | 19.09   | 0.000001          | 0.000002 | -1.92                        |
| LTA     | 20.03   | 19.09   | 0.000001          | 0.000002 | -1.92                        |
| LTB     | 20.03   | 19.09   | 0.000001          | 0.000002 | -1.92                        |
| LTB4R   | 20.03   | 19.09   | 0.000001          | 0.000002 | -1.92                        |
| MIF     | 8.14    | 8.83    | 0.003545          | 0.002197 | 1.61                         |
| SCYE1   | 19.54   | 19.09   | 0.000001          | 0.000002 | -1.37                        |

**Supplement Table 1 (continued): RT-PCR Prof**  
**Apoptosis Array**

| Gene   | AVG ΔCt |         | 2 <sup>-ΔCt</sup> |          | Fold change |
|--------|---------|---------|-------------------|----------|-------------|
|        | siRNA   | Control | siRNA             | Control  |             |
| TRADD  | 12.6    | 18.08   | 0.000161          | 0.000004 | 44.63       |
| TRAF2  | 18.1    | 18.08   | 0.000004          | 0.000004 | -1.01       |
| TRAF3  | 17.68   | 15.85   | 0.000005          | 0.000017 | -3.56       |
| TRAF4  | 18.1    | 18.08   | 0.000004          | 0.000004 | -1.01       |
| B2M    | 0.95    | -1.02   | 0.517632          | 2.027919 | -3.92       |
| HPRT1  | 11.87   | 10.9    | 0.000267          | 0.000523 | -1.96       |
| RPL13A | 12.7    | 3.08    | 0.00015           | 0.118257 | -786.88     |
| GAPDH  | 0       | 0       | 1                 | 1        | 1           |
| ACTB   | 4.06    | 4.27    | 0.000005          | 0.000004 | 1           |

**Inflammation Array**

| Gene   | AVG ΔCt |         | 2 <sup>-ΔCt</sup> |          | Fold change |
|--------|---------|---------|-------------------|----------|-------------|
|        | siRNA   | Control | siRNA             | Control  |             |
| TNF    | 20.03   | 19.09   | 0.000001          | 0.000002 | -1.92       |
| CD40LG | 20.03   | 19.09   | 0.000001          | 0.000002 | -1.92       |
| TOLLIP | 20.03   | 9.13    | 0.000001          | 0.001785 | -1910.85    |
| XCR1   | 20.03   | 19.09   | 0.000001          | 0.000002 | -1.92       |
| B2M    | 1.64    | 19.09   | 0.320856          | 0.000002 | 179049.63   |
| HPRT1  | 16.82   | 19.09   | 0.000009          | 0.000002 | 4.82        |
| RPL13A | 10.2    | 3.99    | 0.00085           | 0.062935 | -74.03      |
| GAPDH  | 0       | 0       | 1                 | 1        | 1           |
| ACTB   | 4.53    | 4.31    | 0.043285          | 0.403321 | 1           |

**Apoptosis -Array**

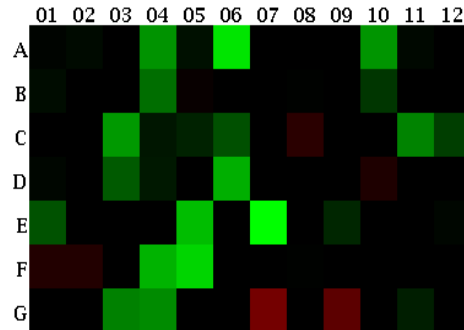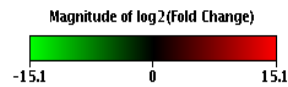

**Inflammation-Array**

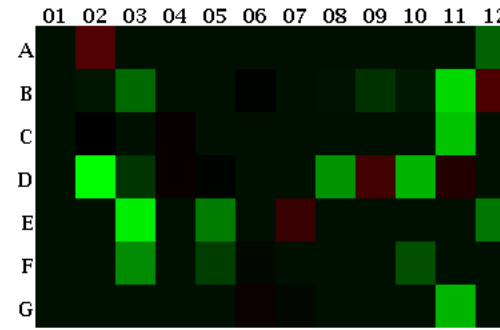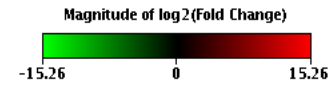

Supplement Figure 2

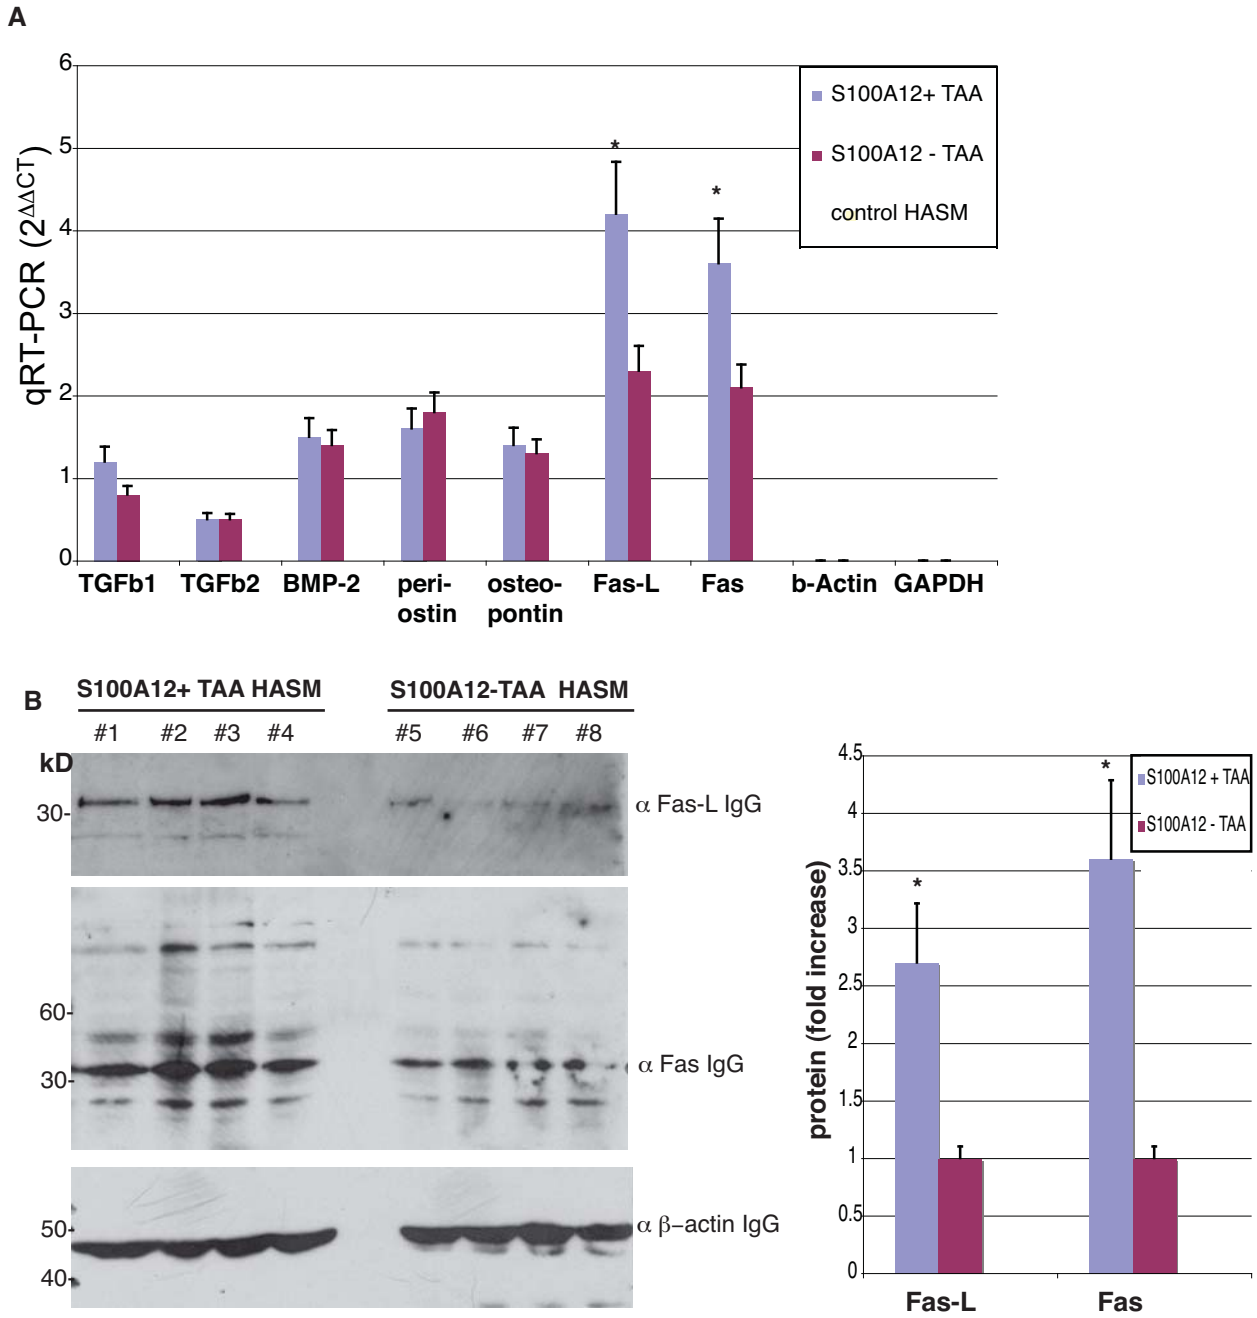

**Supplement Figure 2.** Increased expression of Fas and FasL in HASMC with S100A12 expression. A. Changes in gene expression of members of the TGF- $\beta$  signaling pathways and apoptosis regulating genes measured by q-RT-PCR in HASMC from TAA's normalized to the gene expression in control HASMC. B. Changes in protein expression of Fas-L and Fas in HASMC from TAA's with S100A12 expression (lane 1-4) and in HASMC from TAA's without S100A12 expression (lane 5-8) shows 2.5-3.5 fold increase upon semiquantitative analysis with densitometry (\*  $p < 0.01$ ).

Supplement Figure 1

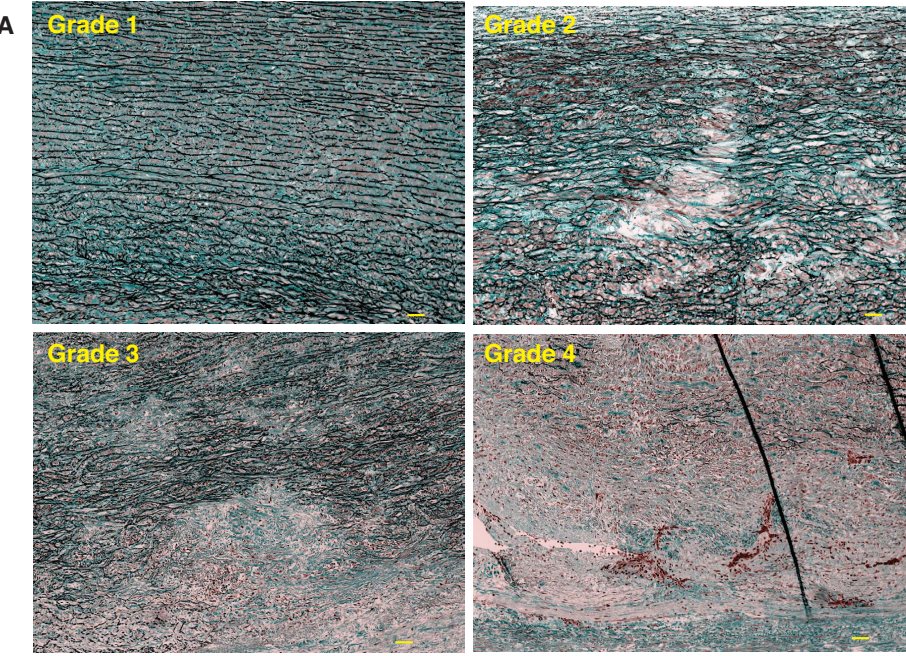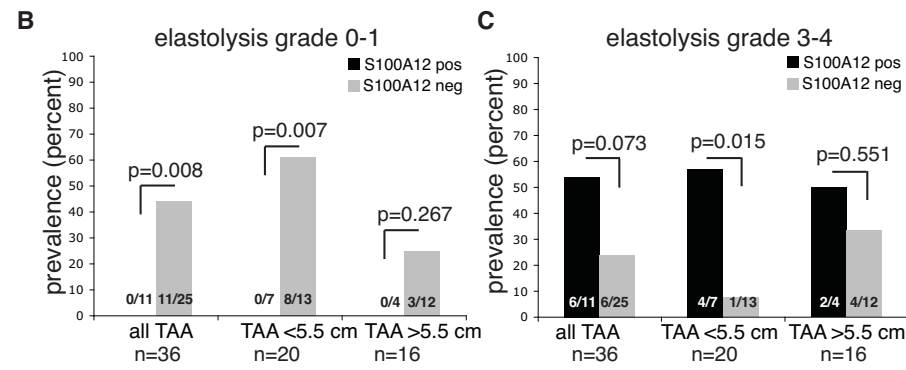

**Supplement Figure 1.** Quantification of elastic aortic fibers in 36 patients with clinically stable thoracic aortic aneurysms. **A.** Movat stain shows medial elastic fiber stained in black for grading of elastic fiber loss: grade 1 with minimal loss, grade 4 with complete loss in some full-thickness portion of the media, and grade 2 and 3 were intermediate (scale bar = 10 micrometer). **B.** For smaller TAA, Grade 0-1 elastolysis are more prevalent among S100A12 negative aneurysms ( $p=0.007$ ), while grade 3-4 is more prevalent among S100A12 positive TAA ( $p=0.015$ ). This relationship is not observed among larger TAA. For each subset (i.e. all TAA, TAA<5.5 cm, or TAA>5.5cm, we compared frequencies using a two-sided Chi-square test for two independent proportions. We applied a Bonferroni correction to the 0.05 significance level of  $0.05/3=0.0167$ .
